# Supplementary material for: Glycerol-derived organic carbonates: environmentally friendly plasticizers for PLA
Source: Royal Society of Chemistry journal article supplement (doi:10.1039/d3ra08922c), 2024-01-01

## Supporting Information

# Glycerol-Derived Organic Carbonates: Environmentally Friendly Plasticizer for PLA

Hyeon Jeong Seo<sup>‡</sup>, Yeong Hyun Seo<sup>‡</sup>, Sang Uk Park, Hyun Ju Lee, Mi Ryu Lee, Jun Hyeong Park, Woo Yeon Cho, Pyung Cheon Lee,<sup>\*</sup> and Bun Yeoul Lee<sup>\*</sup>

Department of Molecular Science and Technology, Ajou University, Suwon 16499, South Korea.

Correspondence to: Bun Yeoul Lee, [bunyeoul@ajou.ac.kr](mailto:bunyeoul@ajou.ac.kr) and Pyung Cheon Lee, [pclee@ajou.ac.kr](mailto:pclee@ajou.ac.kr)

<sup>‡</sup>These authors contributed equally to this work.

**Figure S1.**  $^1\text{H}$  and  $^{13}\text{C}$  NMR spectra of **1**.

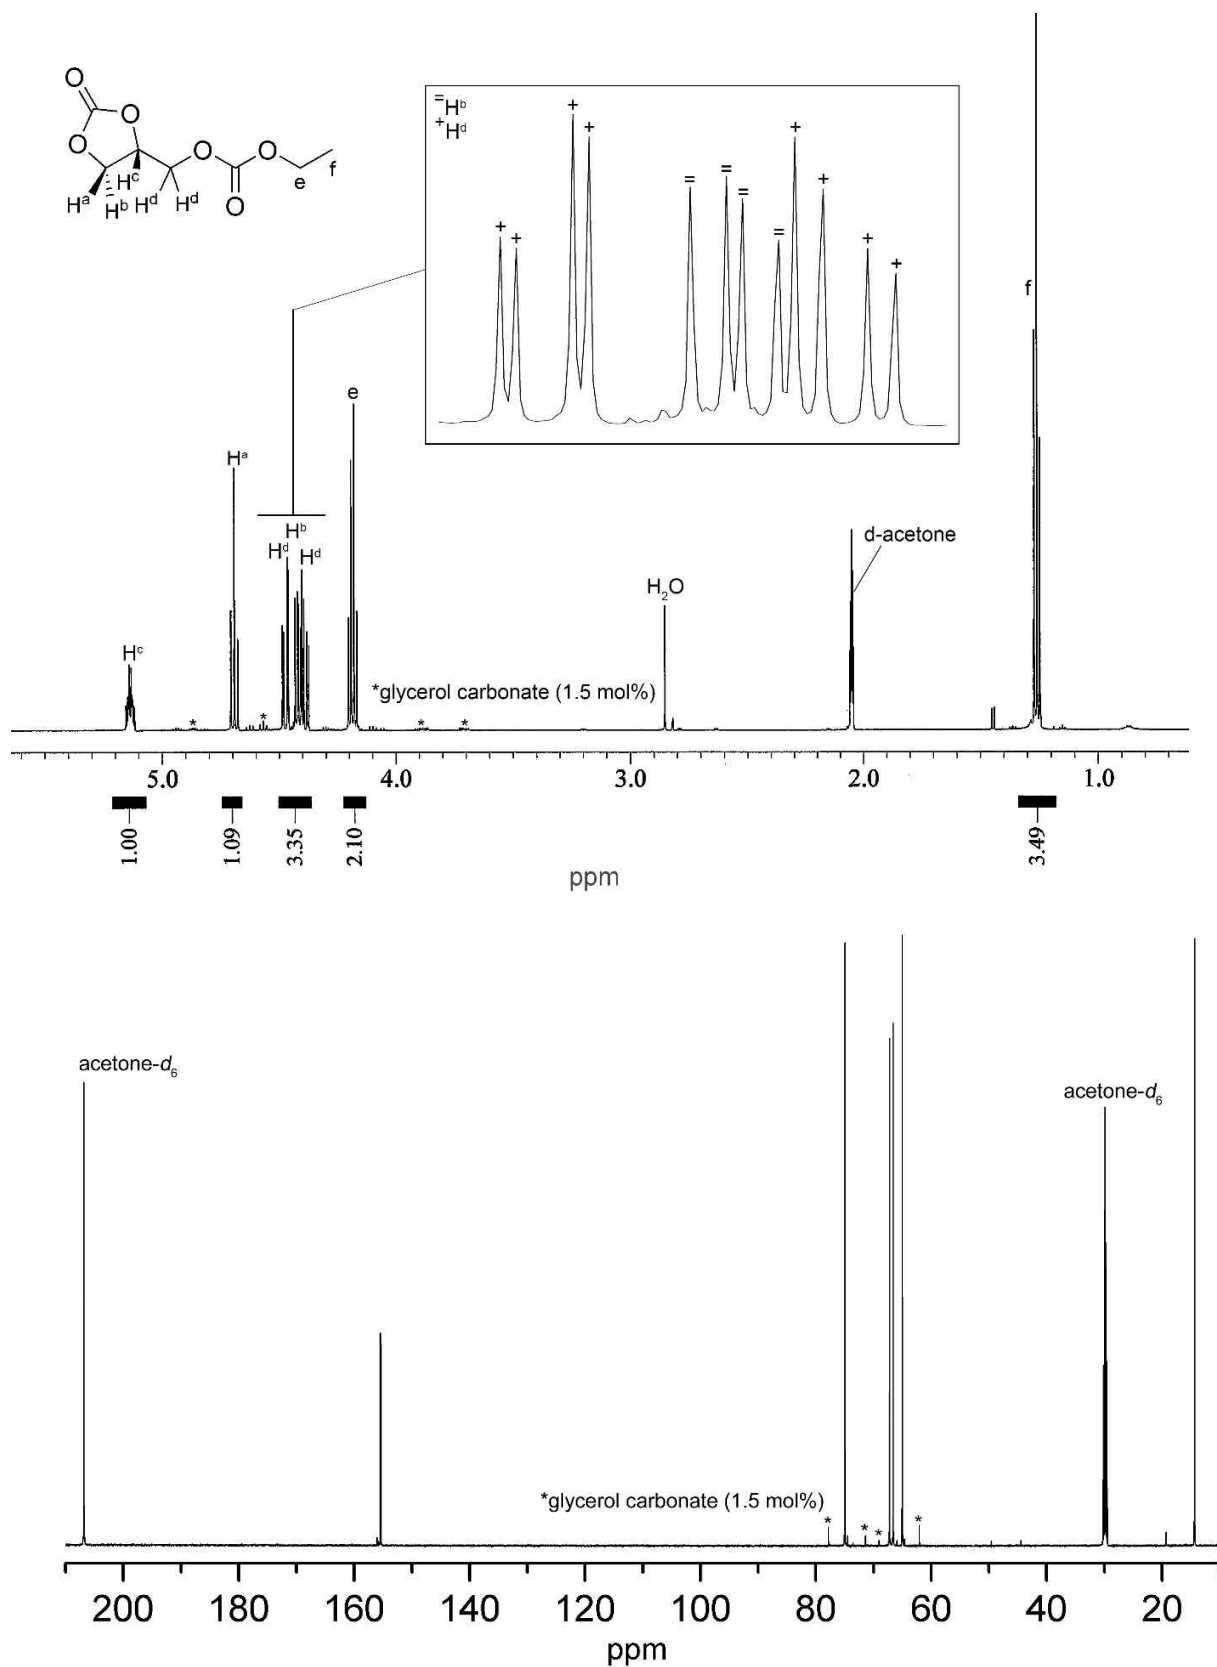

**Figure S2.**  $^1\text{H}$  and  $^{13}\text{C}$  NMR spectra of **2**.

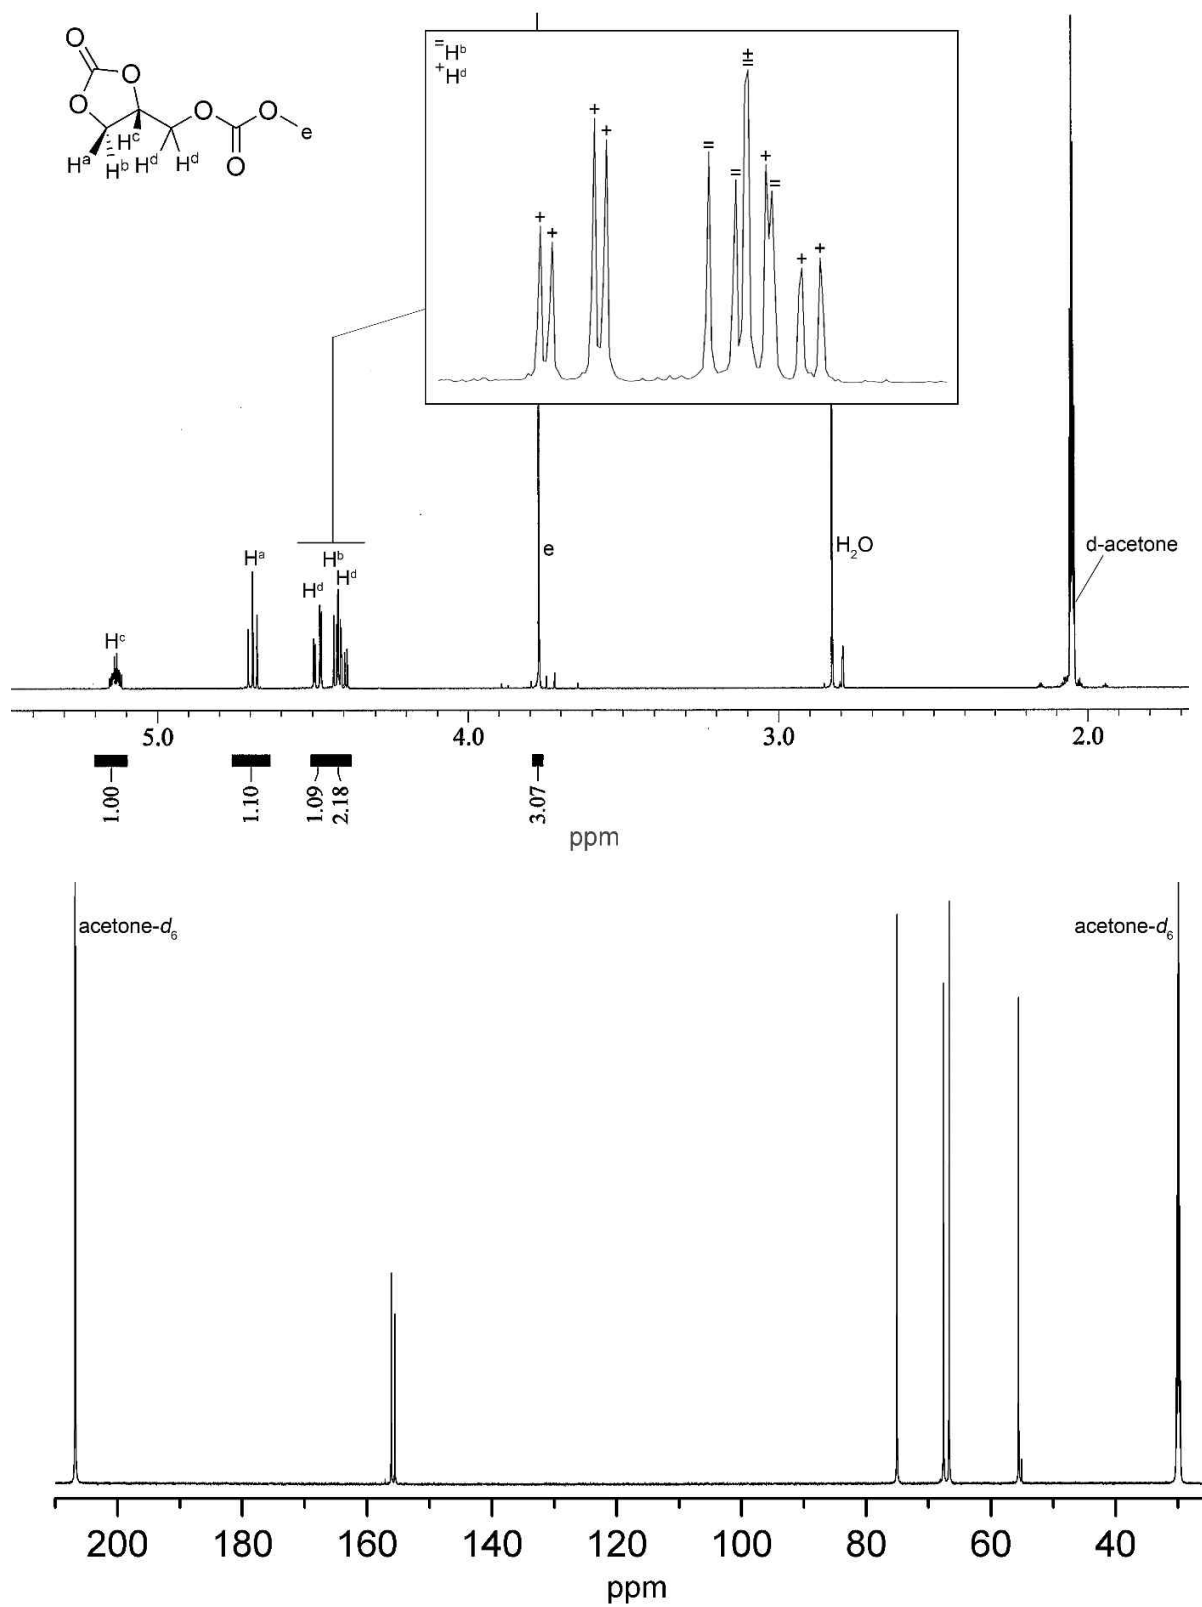

**Figure S3.**  $^1\text{H}$  and  $^{13}\text{C}$  NMR spectra of **3**.

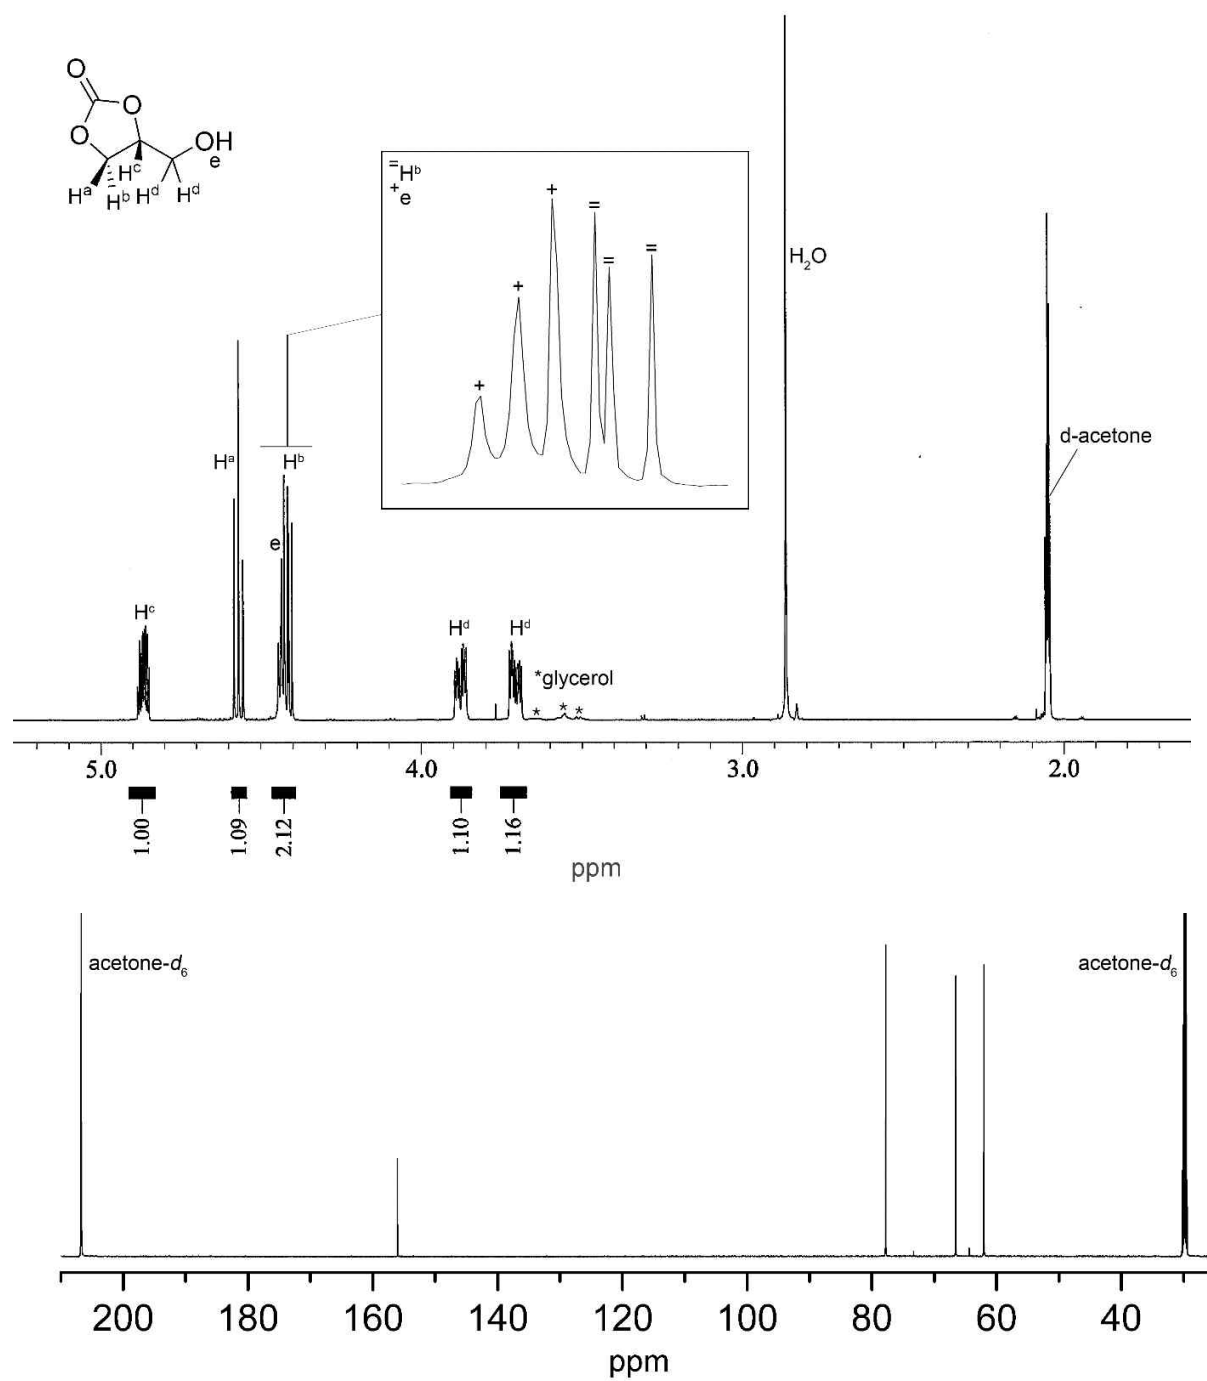

Figure S4.  $^1\text{H}$  and  $^{13}\text{C}$  NMR spectra of **4**.

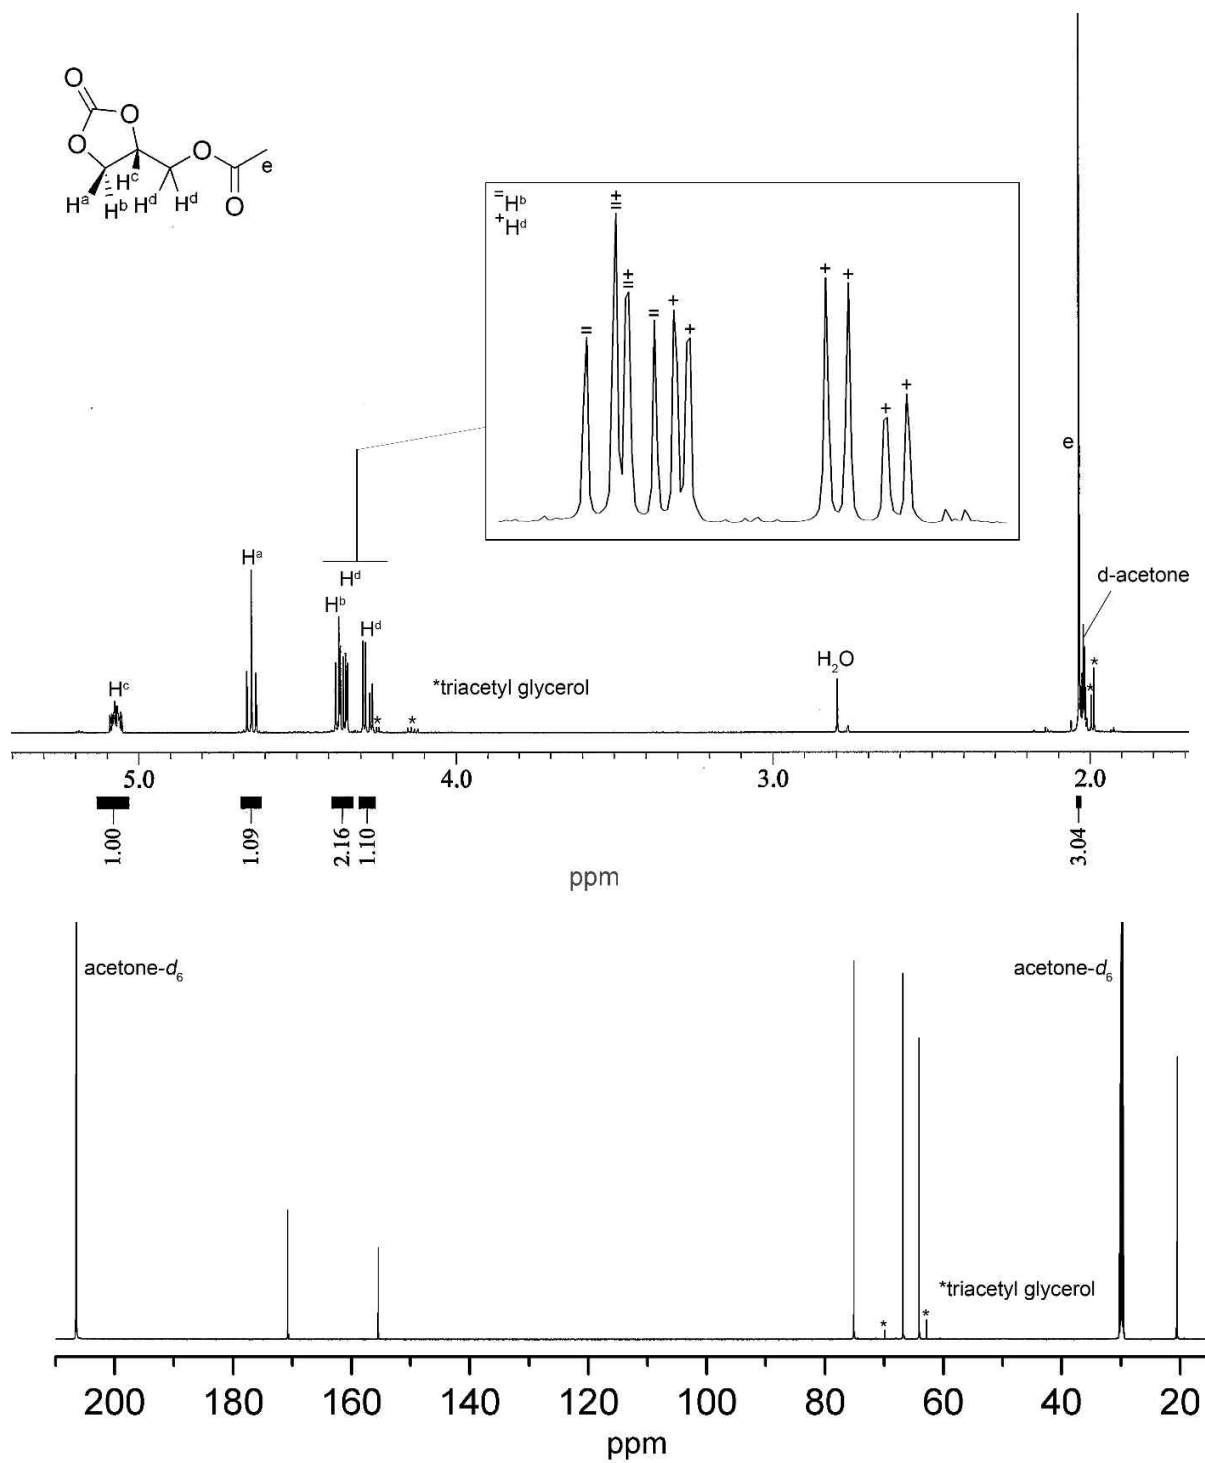

**Figure S5.** DSC traces of plasticizers **1**, **2**, **4**, and ATBC.

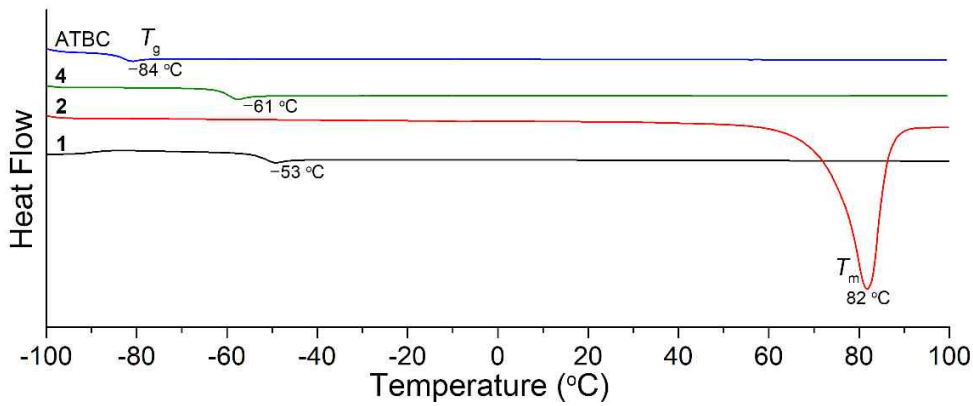

**Figure S6.** The second heating DSC traces of PLA/ATBC blends compared to neat PLA.

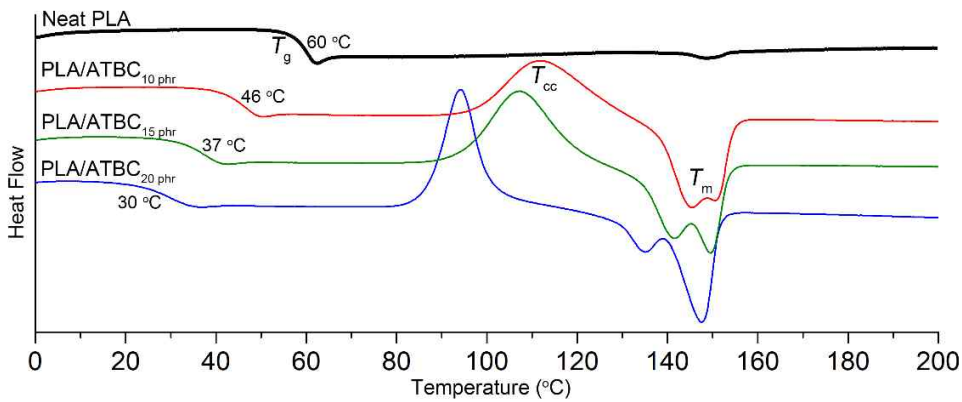

**Figure S7.** (a) The second heating DSC traces of PLA/**2** blends compared to neat PLA and (b) linear correlation between the content of **2** and  $T_g$  of the blends.

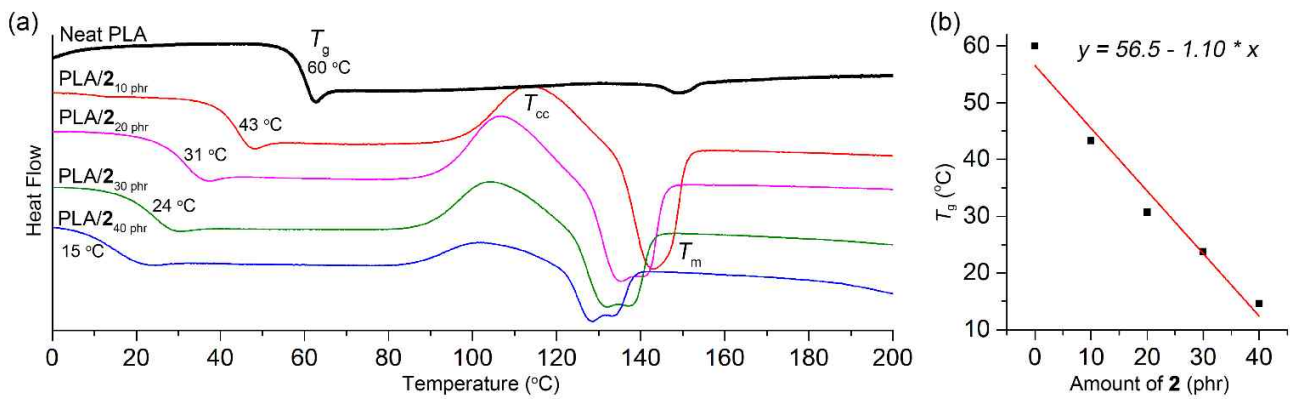

**Figure S8.** (a) The second heating DSC traces of PLA/4 blends compared to neat PLA and (b) linear correlation between the content of 4 and  $T_g$  of the blends.

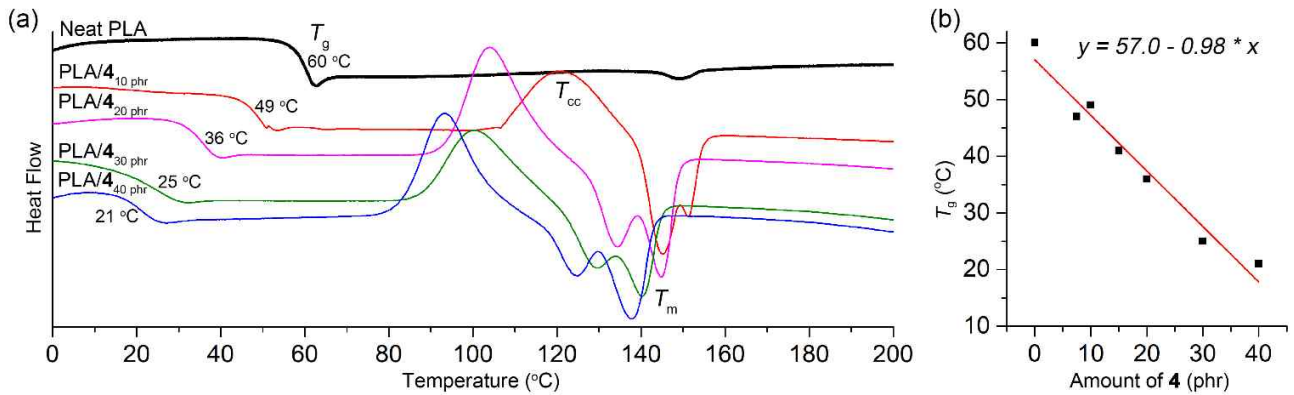

**Figure S9.** Temperature dependence of (a)  $\tan\delta$ , (b) storage modulus ( $E'$ ) and (c) loss modulus ( $E''$ ) curves from DMA runs illustrated for PLA/ATBC blends compared to neat PLA.

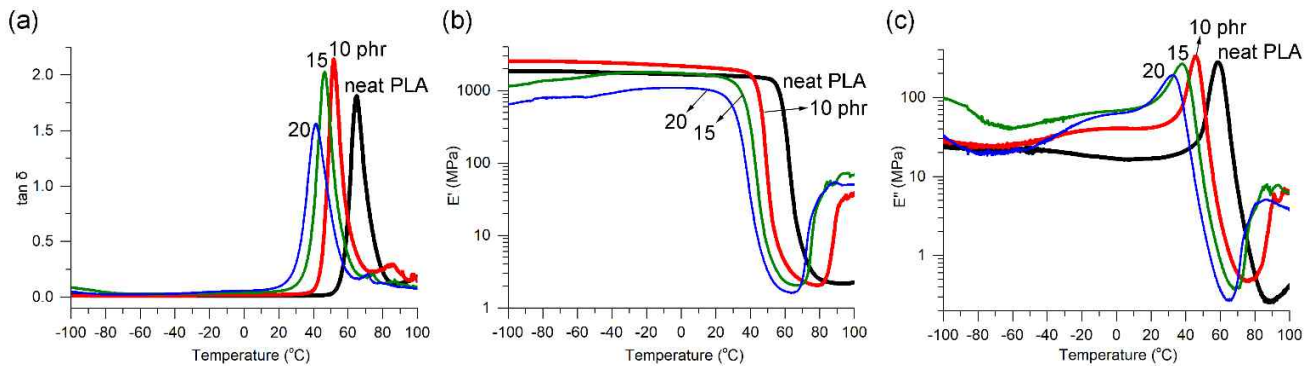

**Figure S10.** Temperature dependence of (a)  $\tan\delta$ , (b) storage modulus ( $E'$ ) and (c) loss modulus ( $E''$ ) curves from DMA runs illustrated for PLA/2 blends compared to neat PLA.

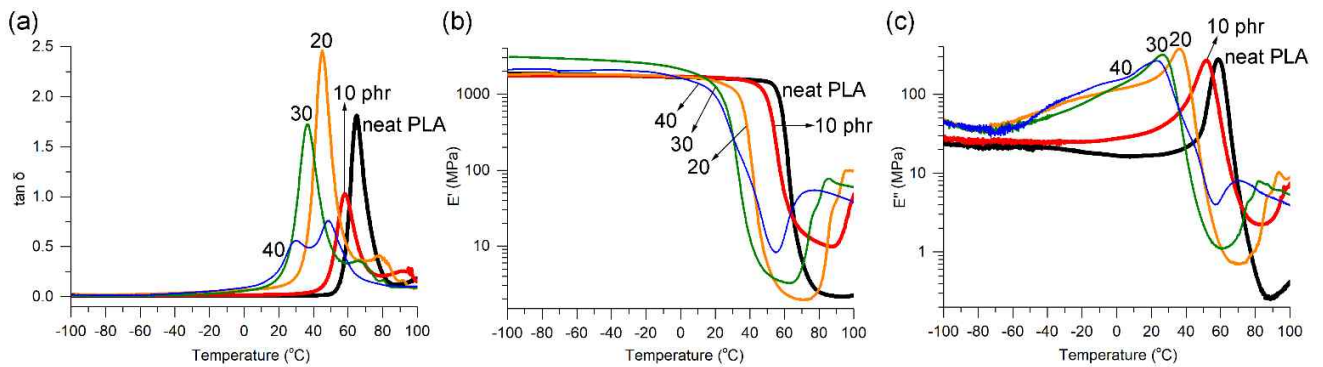

**Figure S11.** Temperature dependence of (a)  $\tan\delta$ , (b) storage modulus ( $E'$ ) and (c) loss modulus ( $E''$ ) curves from DMA runs illustrated for PLA/4 blends compared to neat PLA.

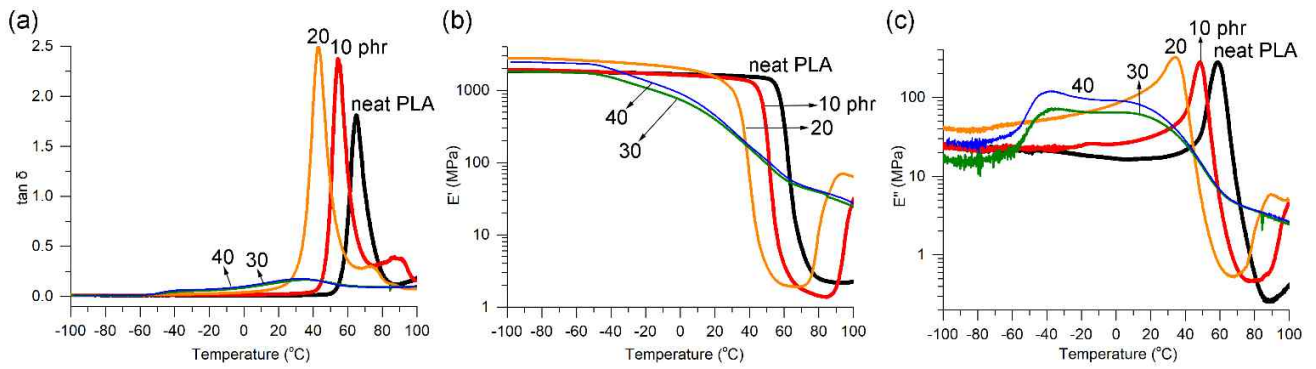

**Figure S12.** Stress-strain behavior for PLA/2 blends compared to PLA/1 blends.

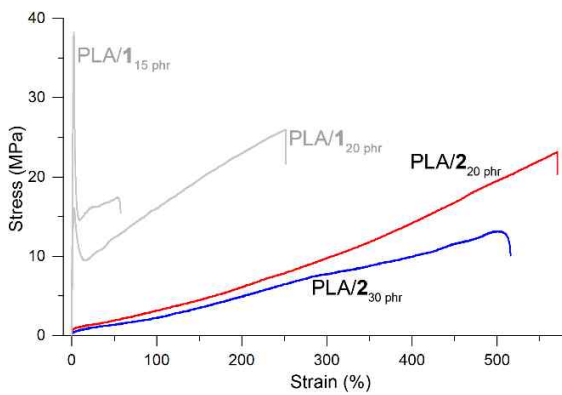

**Figure S13.** Stress-strain behavior for PLA/4 blends compared to PLA/1 blends.

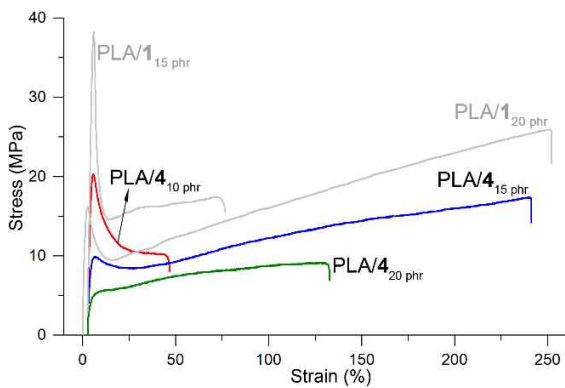



**Figure S14.** Stress-strain behavior for PLA/ATBC blends compared to PLA/1 blends.

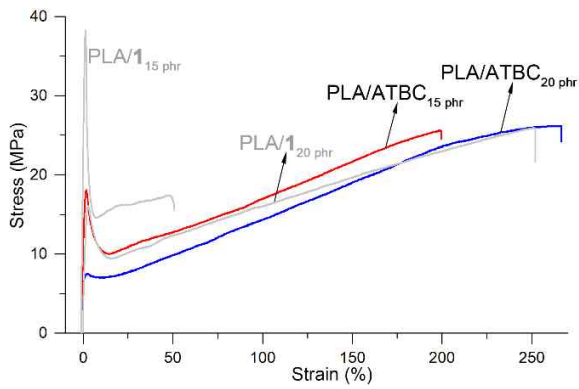

**Figure S15.** SEM images of the tensile fracture surfaces of PLA/2 blends.

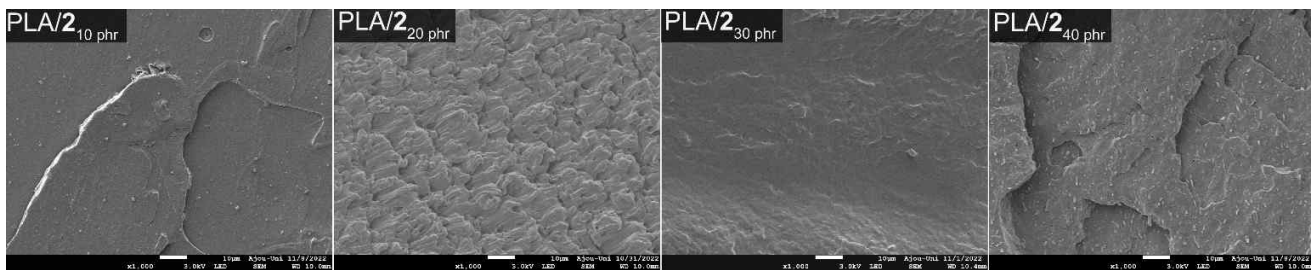

**Figure S16.** SEM images of the tensile fracture surfaces of PLA/4 blends.

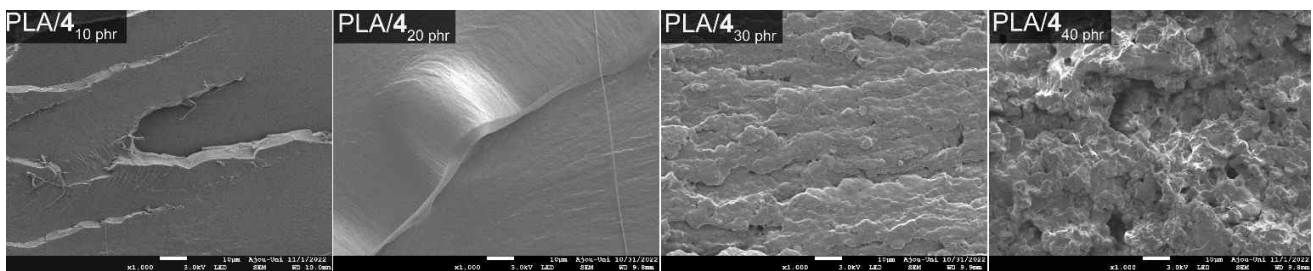

Figure S17. TGA curves of PLA/1 blends.

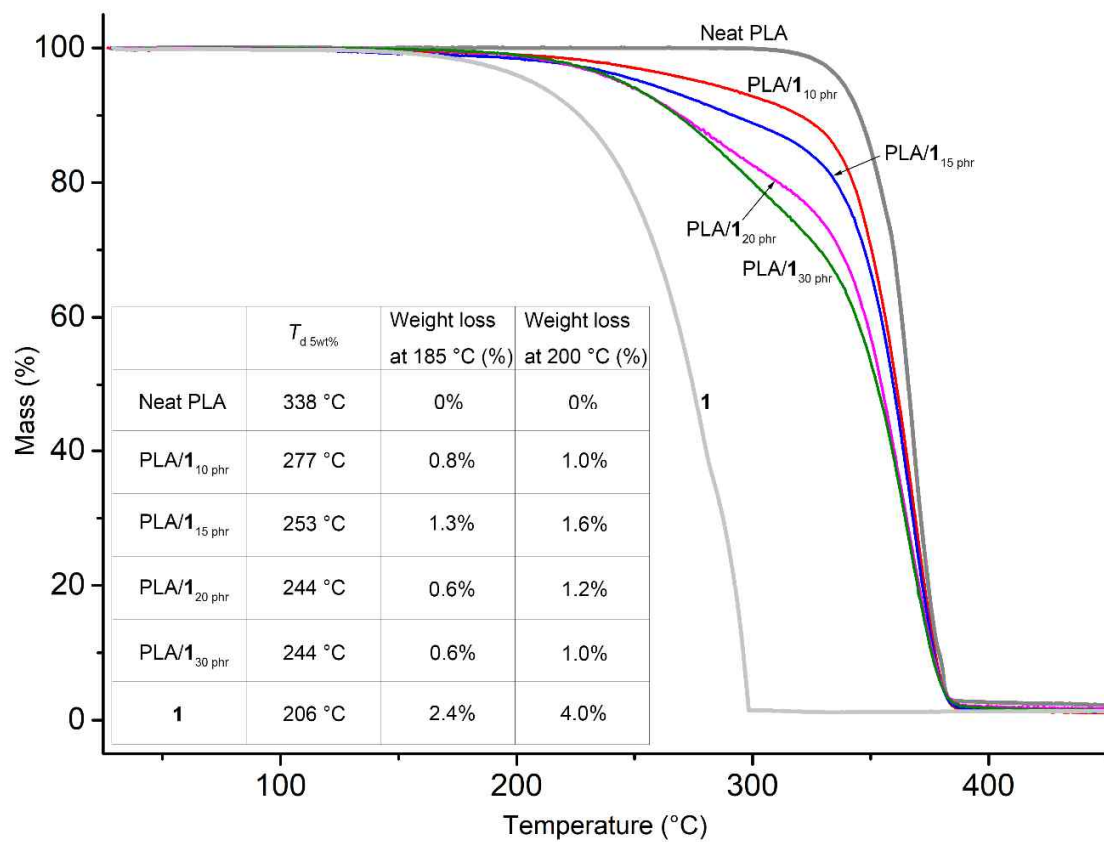

Figure S18. Full range DSC curves of PLA/1 blends.

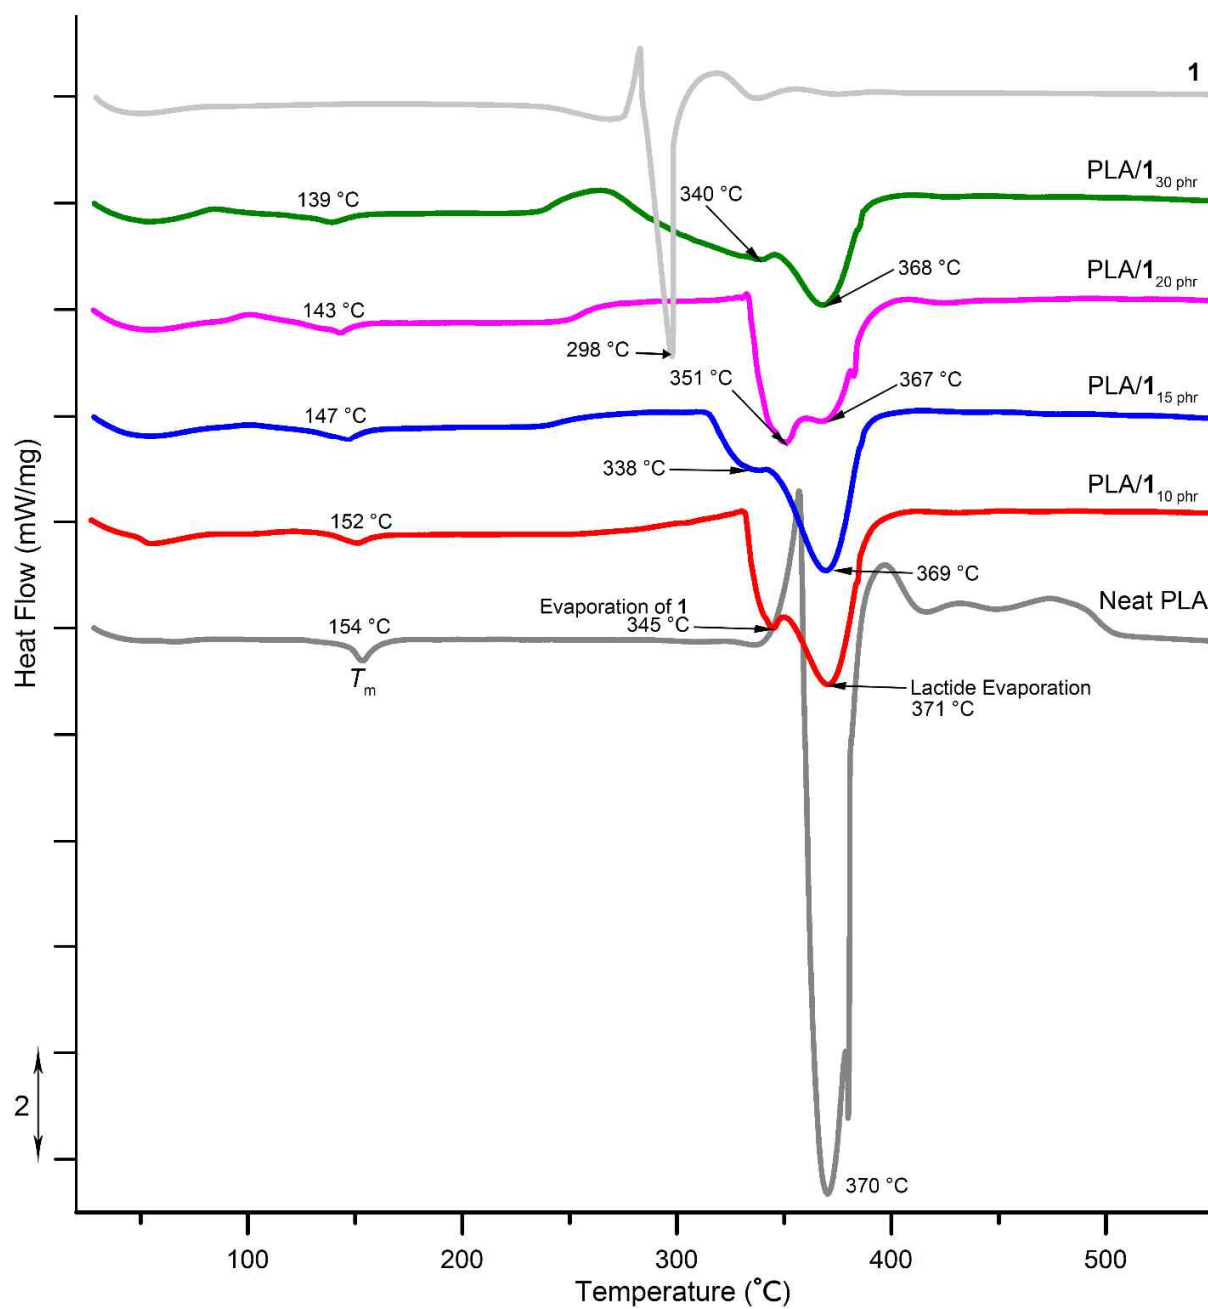

**Figure S19.** Dynamic moduli vs. angular frequency for PLA/1<sub>10 phr</sub>, PLA/1<sub>20 phr</sub>, and PLA/1<sub>30 phr</sub> blends compared to neat PLA and PBAT measured using rotational rheometer at 170 °C.

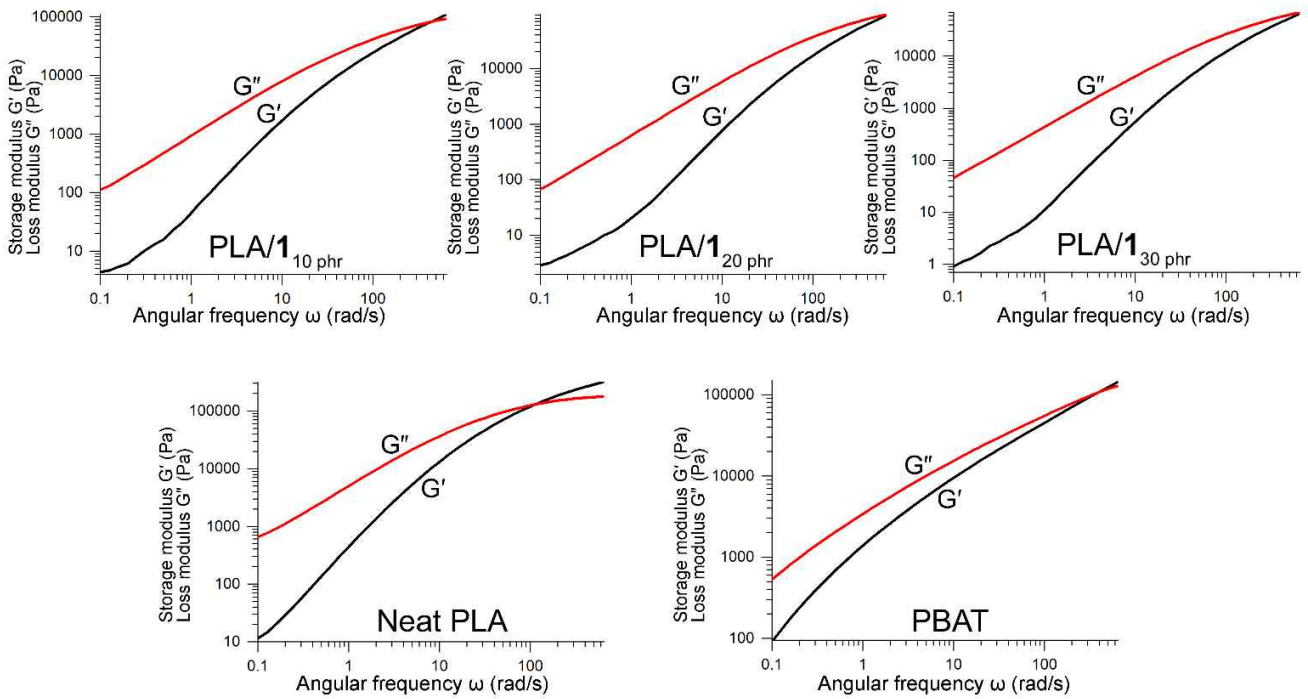

**Figure S20.** WAXD curves of unaged and aged specimens of (a) PLA/ATBC<sub>20 phr</sub> and (b) PLA/1<sub>20 phr</sub>.

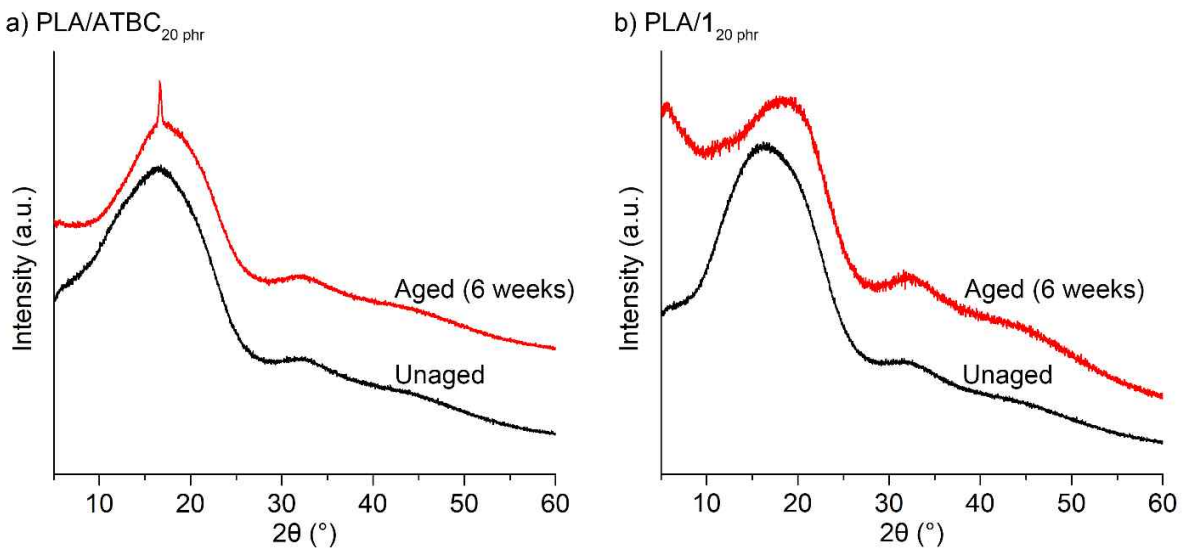

**Figure S21.** Biodegradability of (a) glycerol carbonate (**3**) and (b) propylene carbonate assessed by monitoring the amount of evolved CO<sub>2</sub> over time in a respirometer set to 25 °C and 50–55% water content with continuous air flow.

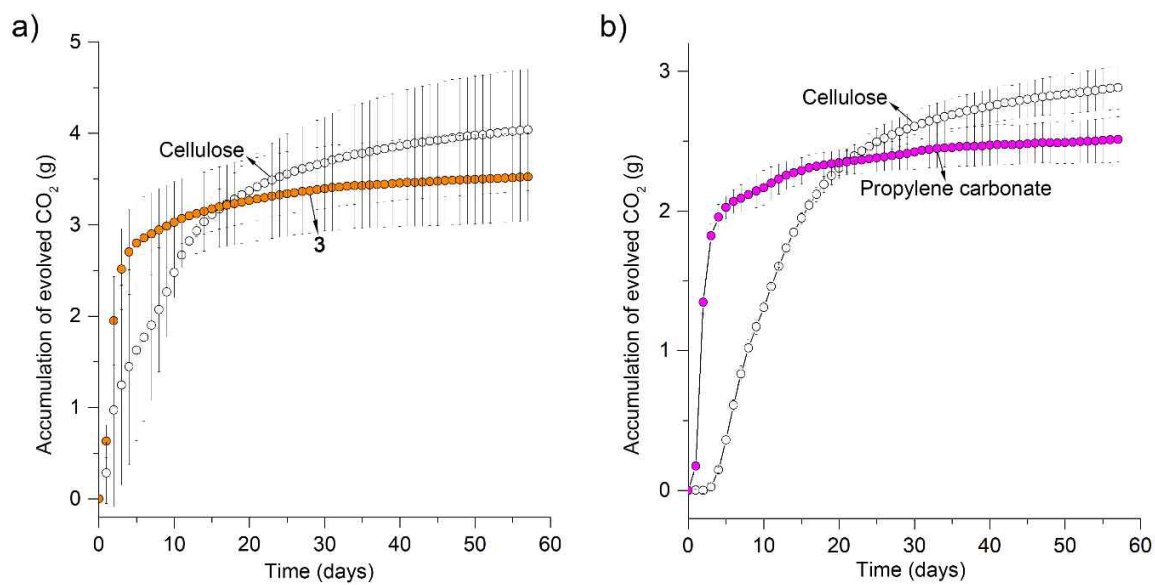

**Figure S22.**  $^1\text{H}$  NMR spectra recorded to investigate stability of **2** in water ( $\text{D}_2\text{O}$ ) over time.

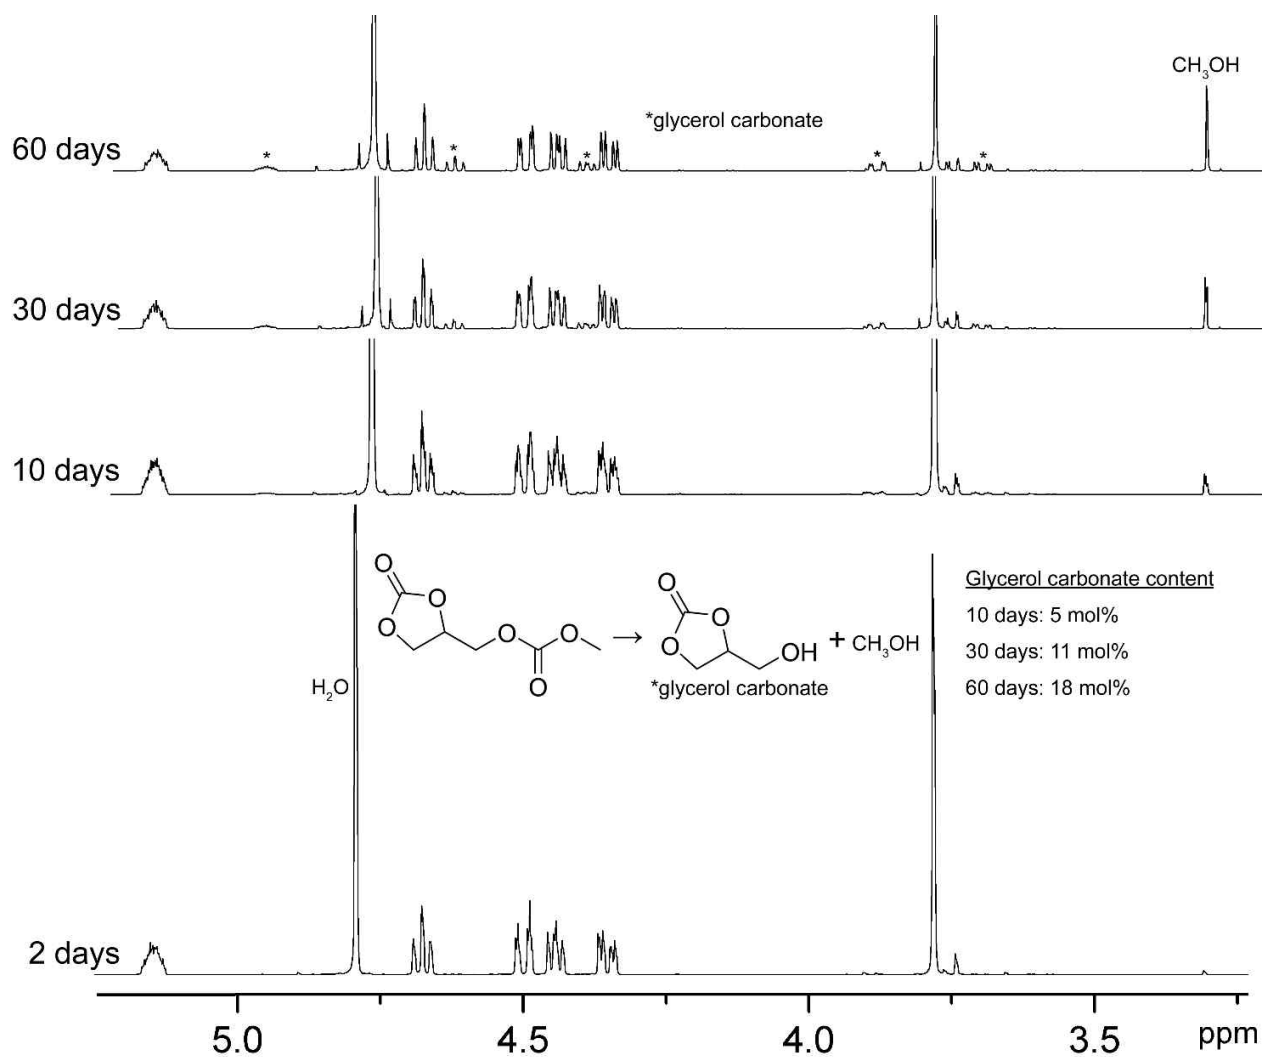

**Figure S23.** Custom-made reactor used for blending.

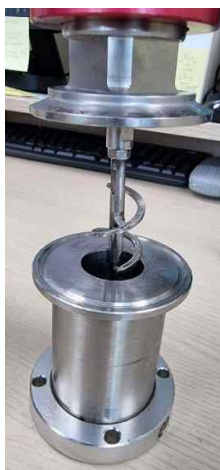

Supplement: d3ra08922c1.pdf [file d3ra08922c1.pdf]
